# Supplementary material for: Pathologist Validation of a Machine Learning–Derived Feature for Colon Cancer Risk Stratification
Source: PubMed Central journal article supplement — JAMA Netw Open. 2023 Mar 14;6(3):e2254891. doi: 10.1001/jamanetworkopen.2022.54891 (PMC10015309; doi:10.1001/jamanetworkopen.2022.54891), 2023-03-14

## Supplementary Online Content

L'Imperio V, Wulczyn E, Plass M, et al. Pathologist validation of a machine learning–derived feature for colon cancer risk stratification. *JAMA Netw Open*. 2023;6(3):e2254891. doi:10.1001/jamanetworkopen.2022.54891

**eTable 1.** TAF Scoring per Pathologist

**eTable 2.** Expanded Multivariable Analysis for Association With Clinical Outcome

**eTable 3.** Expanded Univariable Analysis for Association With Clinical Outcome

**eFigure 1.** Example 1 Used for Illustrating the Tumor Adipose Feature

**eFigure 2.** Example 2 Used for Illustrating the Tumor Adipose Feature

**eFigure 3.** Example 3 Used for Illustrating the Tumor Adipose Feature

**eFigure 4.** Example 4 Used for Illustrating the Tumor Adipose Feature

**eFigure 5.** Forest Plots for Expanded Multivariable Analysis Corresponding to eTable 2

This supplementary material has been provided by the authors to give readers additional information about their work.

**eTable 1.** TAF Scoring per Pathologist

Gray boxes represent cases with agreement on the TAF extent between the two observers.

| TAF Scoring (Path 2) | TAF Scoring (Path 1) |                 |                   |                   | Total |
|----------------------|----------------------|-----------------|-------------------|-------------------|-------|
|                      | <i>Not observed</i>  | <i>Unifocal</i> | <i>Multifocal</i> | <i>Widespread</i> |       |
| <i>Not observed</i>  | 120                  | 13              | 6                 | 2                 | 141   |
| <i>Unifocal</i>      | 11                   | 15              | 15                | 9                 | 50    |
| <i>Multifocal</i>    | -                    | 2               | 10                | 6                 | 18    |
| <i>Widespread</i>    | 2                    | 3               | 4                 | 40                | 49    |
| <i>Total</i>         | 133                  | 33              | 35                | 57                | 258   |

### Additional TAF scoring information

There was initial disagreement on the presence/absence of TAF in 34 of 258 cases (14%). Of the 34 cases with disagreement on the presence versus absence of TAF, 16 were ultimately resolved as present; 10 as unifocal, 4 as multifocal, and 2 as widespread. For the cases with TAF identified by both pathologists on initial review (n=104), there was initial agreement on TAF extension in 65 (63%) cases. For cases with initial disagreement on TAF extension, the cases scored as unifocal by one of the pathologists but not the other (n=29) were typically “upgraded” to either multifocal (n=17) or widespread (n=11) after joint review, with only 1 case retaining the unifocal designation. For cases initially scored as multifocal TAF by a single pathologist (n=27), 17 were resolved as multifocal and 10 were resolved as widespread, with none assigned to the unifocal group. For cases initially scored as widespread TAF by only one pathologist (n=22), most (n=21) were resolved as widespread after alignment, with only 1 case resolving as unifocal. In summary, these data demonstrate substantial agreement for widespread TAF and the most common need for resolution corresponded to the distinction between unifocal and multifocal TAF.

**eTable 2.** Expanded Multivariable Analysis for Association With Clinical Outcome

| Variable             | Level        | All-cause mortality<br>(no. observed: 121/258, 47%) |                  | Disease-specific mortality<br>(no. observed: 36/258, 14%) |              |
|----------------------|--------------|-----------------------------------------------------|------------------|-----------------------------------------------------------|--------------|
|                      |              | HR [95% CI]                                         | p-value          | HR [95% CI]                                               | p-value      |
| Age                  | N/A          | <b>1.07 [1.05-1.09]</b>                             | <b>&lt;0.005</b> | 1.01 [0.98-1.04]                                          | 0.68         |
| Sex                  | Female       | 1.0 (reference)                                     |                  |                                                           |              |
|                      | Male         | 0.93 [0.64-1.36]                                    | 0.72             | 0.86 [0.44-1.68]                                          | 0.66         |
| Stage                | II           | 1.0 (reference)                                     |                  |                                                           |              |
|                      | III          | <b>1.60 [1.03-2.51]</b>                             | <b>0.04</b>      | <b>3.57 [1.39-9.18]</b>                                   | <b>0.008</b> |
| Grade                | Low          | 1.0 (reference)                                     |                  |                                                           |              |
|                      | High         | 0.75 [0.48-1.17]                                    | 0.20             | 0.56 [0.25-1.23]                                          | 0.15         |
| Tumor Loc.           | Left         | 1.0 (reference)                                     |                  |                                                           |              |
|                      | Right        | 1.08 [0.72-1.61]                                    | 0.72             | 0.82 [0.40-1.65]                                          | 0.57         |
| Hist. Type           | Adeno        | 1.0 (reference)                                     |                  |                                                           |              |
|                      | Mucinous     | 0.78 [0.40-1.52]                                    | 0.46             | 0.94 [0.32-2.78]                                          | 0.91         |
| LVI                  | Absent / NOS | 1.0 (reference)                                     |                  |                                                           |              |
|                      | Present      | 1.15 [0.72-1.84]                                    | 0.55             | 1.13 [0.45-2.85]                                          | 0.80         |
| TAF<br>(categorical) | Absent       | 1.0 (reference)                                     |                  |                                                           |              |
|                      | Unifocal     | 1.30 [0.64-2.65]                                    | 0.46             | 0.58 [0.13-2.62]                                          | 0.48         |
|                      | Multifocal   | 0.85 [0.46-1.56]                                    | 0.59             | 0.79 [0.23-2.76]                                          | 0.72         |
|                      | Widespread   | <b>1.79 [1.14-2.81]</b>                             | <b>0.01</b>      | <b>2.19 [1.01-4.75]</b>                                   | <b>0.05</b>  |

**eTable 3.** Expanded Univariable Analysis for Association With Clinical Outcome

| Variable             | Level        | All-cause mortality<br>(no. observed: 121/258, 47%) |                  | Disease-specific mortality<br>(no. observed: 36/258, 14%) |                  |
|----------------------|--------------|-----------------------------------------------------|------------------|-----------------------------------------------------------|------------------|
|                      |              | HR [95% CI]                                         | p-value          | HR [95% CI]                                               | p-value          |
| Age                  | N/A          | <b>1.06 [1.04-1.09]</b>                             | <b>&lt;0.005</b> | 1.00 [0.98-1.03]                                          | 0.85             |
| Sex                  | Female       | 1.0 (reference)                                     |                  |                                                           |                  |
|                      | Male         | 0.95 [0.66-1.35]                                    | 0.77             | 0.94 [0.49-1.82]                                          | 0.86             |
| Stage                | II           | 1.0 (reference)                                     |                  |                                                           |                  |
|                      | III          | <b>1.62 [1.12-2.34]</b>                             | <b>0.01</b>      | <b>3.94 [1.72-9.00]</b>                                   | <b>&lt;0.005</b> |
| Grade                | Low          | 1.0 (reference)                                     |                  |                                                           |                  |
|                      | High         | 0.91 [0.60-1.36]                                    | 0.63             | 0.89 [0.42-1.89]                                          | 0.76             |
| Tumor Loc.           | Left         | 1.0 (reference)                                     |                  |                                                           |                  |
|                      | Right        | 1.37 [0.94-2.00]                                    | 0.10             | 0.77 [0.40-1.48]                                          | 0.43             |
| Hist. Type           | Adeno        | 1.0 (reference)                                     |                  |                                                           |                  |
|                      | Mucinous     | 0.87 [0.46-1.67]                                    | 0.68             | 1.19 [0.42-3.36]                                          | 0.74             |
| LVI                  | Absent / NOS | 1.0 (reference)                                     |                  |                                                           |                  |
|                      | Present      | 1.45 [0.97-2.14]                                    | 0.07             | 2.03 [0.92-4.45]                                          | 0.08             |
| TAF<br>(categorical) | Absent       | 1.0 (reference)                                     |                  |                                                           |                  |
|                      | Unifocal     | 0.95 [0.49-1.86]                                    | 0.88             | 0.72 [0.16-3.14]                                          | 0.66             |
|                      | Multifocal   | 1.05 [0.58-1.92]                                    | 0.87             | 0.91 [0.26-3.15]                                          | 0.88             |
|                      | Widespread   | <b>2.09 [1.40-3.14]</b>                             | <b>&lt;0.005</b> | <b>3.17 [1.56-6.42]</b>                                   | <b>&lt;0.005</b> |

**eFigure 1.** Example 1 Used for Illustrating the Tumor Adipose Feature (TAF) in the Context of a Slide, (A) the Full Slide and (B-D) Zoomed in Panels. In the zoomed-in panels, the top right “minimap” shows the location of the crop as a black box. Note, the zoomed in panels represent regions enriched for TAF according to the published computational model, these regions do not correspond to the specific TAF “patches” themselves or to pathologist-identified TAF. Width of full portion of image pictured in B is 9mm.

**Additional training details:** Pathologists reviewed both previously published TAF patches and the TAF regions highlighted by the bounding boxes in Supplementary Figures 1-4. These examples provided contextual examples of TAF (as identified based on the previously described computational feature clustering). The overall TAF training and review process was established via discussion amongst pathologists and researchers involved in the initial TAF study and consisted of approximately 4 hours of image review and discussion followed by independent scoring and discussion of discordant cases across approximately one hundred archived cases.

A

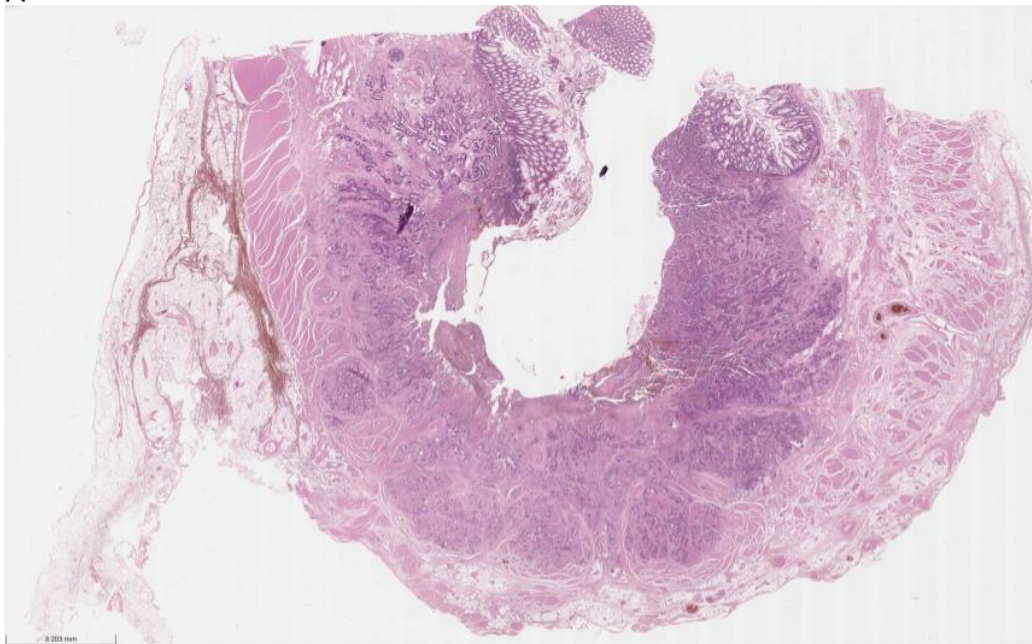

B

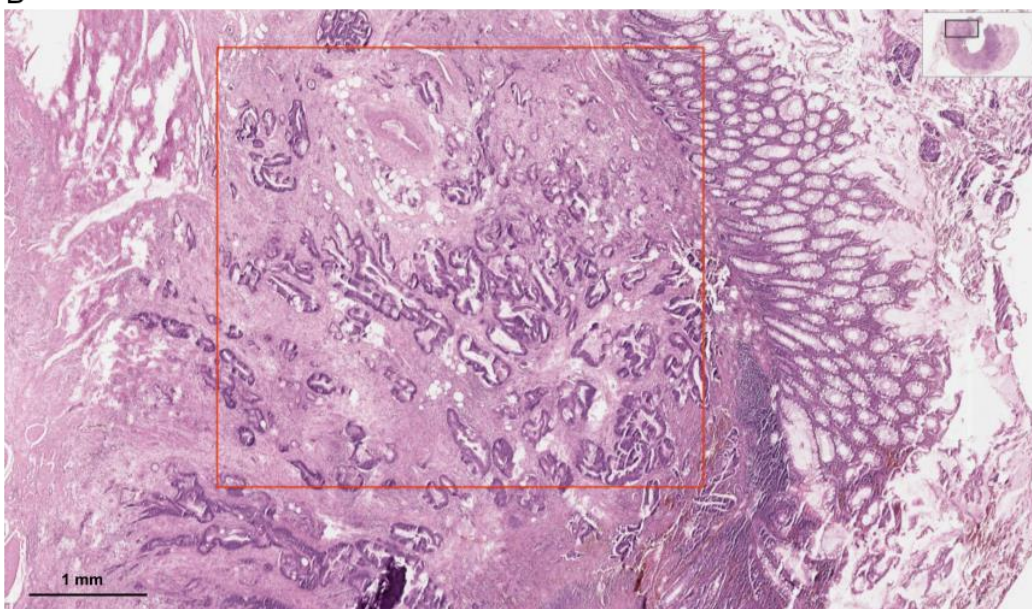



**eFigure 2.** Example 2 Used for Illustrating the Tumor Adipose Feature (TAF) in the Context of a Slide. (A) the full slide and (B-D) zoomed in panels. In the zoomed-in panels, the top right “minimap” shows the location of the crop as a black box. Note, the zoomed in panels represent regions enriched for TAF based on the previously published computational model, these regions do not correspond to the specific TAF “patches” themselves. Width of full portion of image pictured in B-D is 4.5mm.

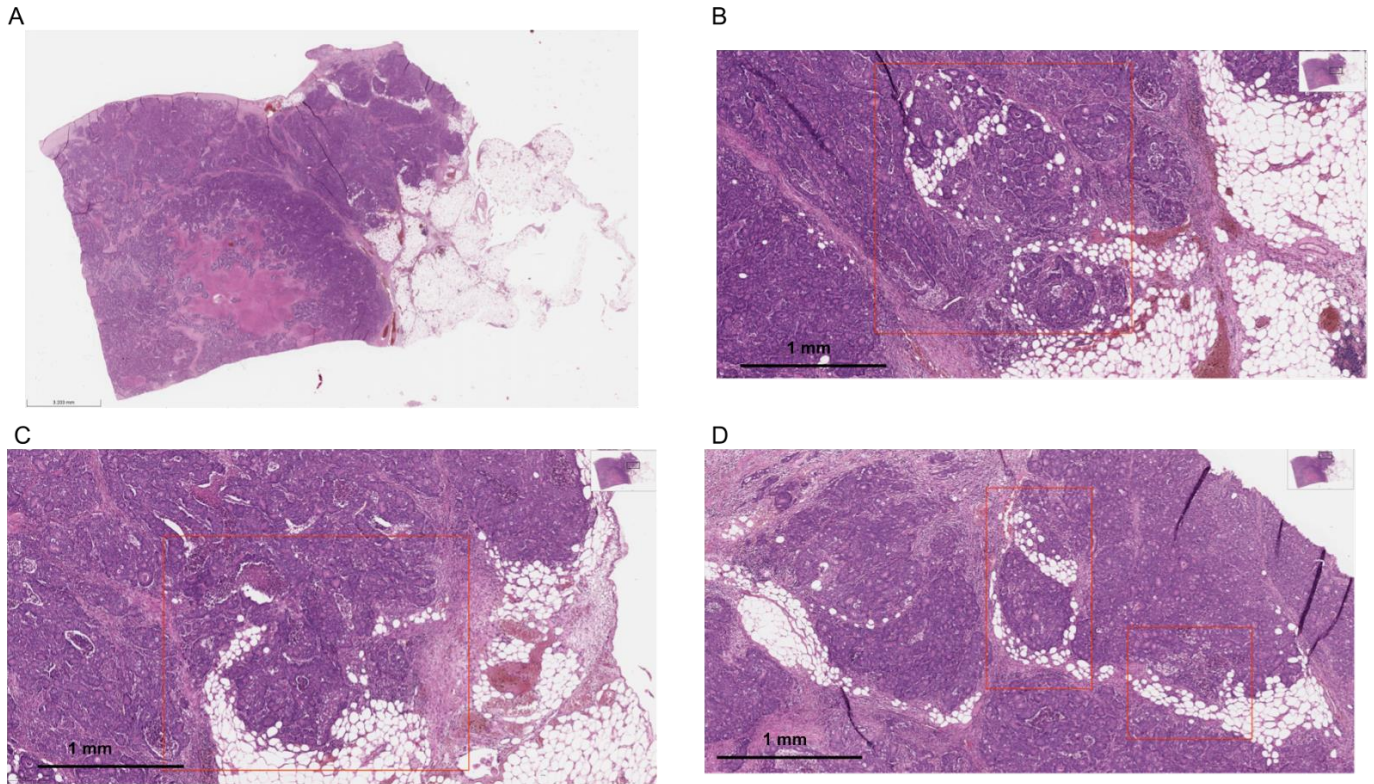

**eFigure 3.** Example 3 Used for Illustrating the Tumor Adipose Feature (TAF) in the Context of a Slide, (A) the Full Slide and (B-C) Zoomed in Panels. In the zoomed-in panels, the top right “minimap” shows the location of the crop as a black box. Note, the zoomed in panels represent regions enriched for TAF based on the previously published computational model, these regions do not correspond to the specific TAF “patches” themselves. Width of full portion of image pictured in B-C is 4.5mm.

A

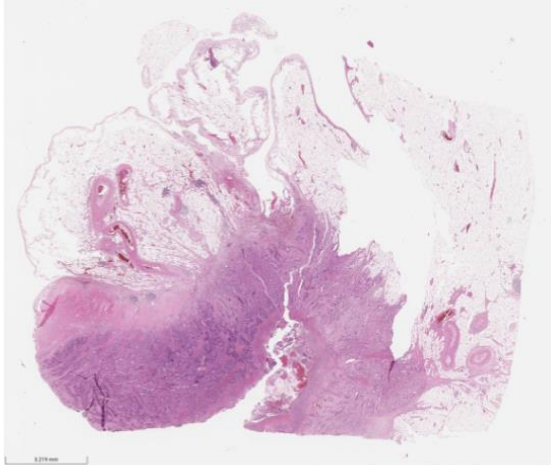

B

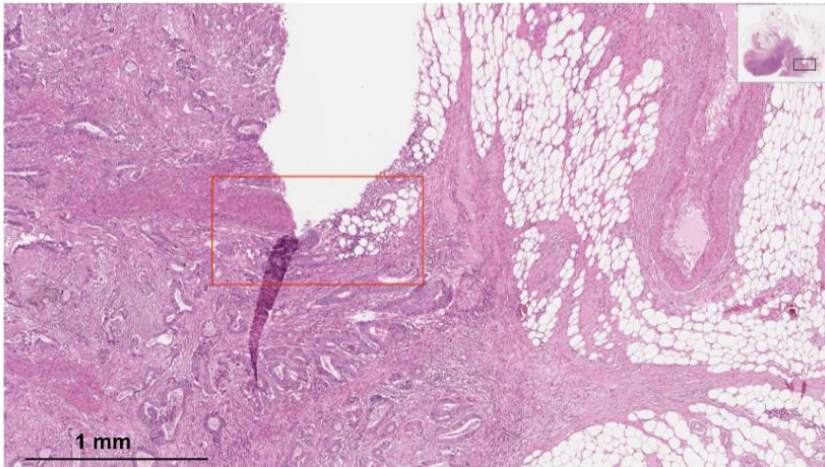

C

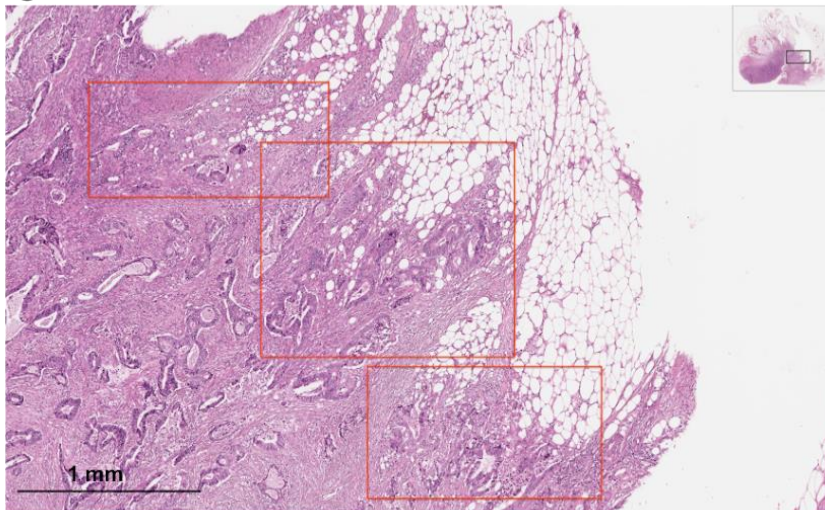



**eFigure 4.** Example 4 Used for Illustrating the Tumor Adipose Feature (TAF) in the Context of a Slide, (A) the Full Slide and (B) as a Zoomed in Panel. In the zoomed-in panel, the top right “minimap” shows the location of the crop as a black box. Note, the zoomed in panels represent regions enriched for TAF based on the previously published computational model, these regions do not correspond to the specific TAF “patches” themselves. Width of full portion of image pictured in B is 4.5mm.

A

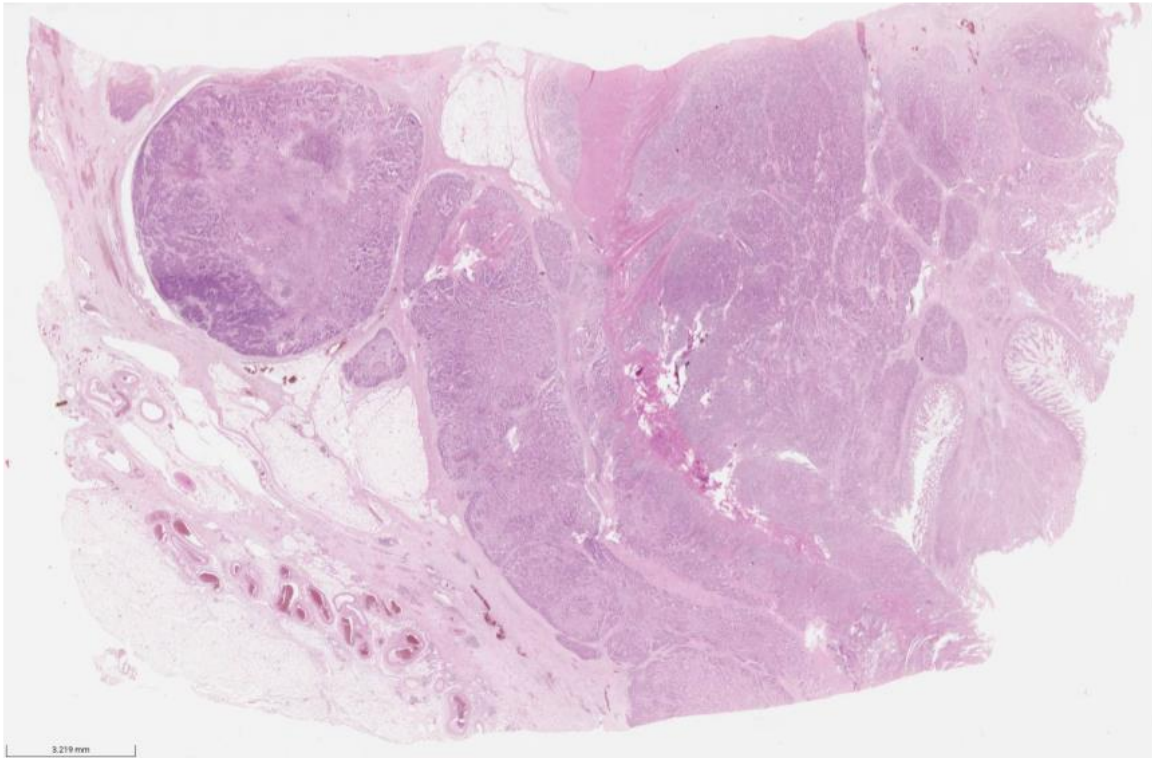

B

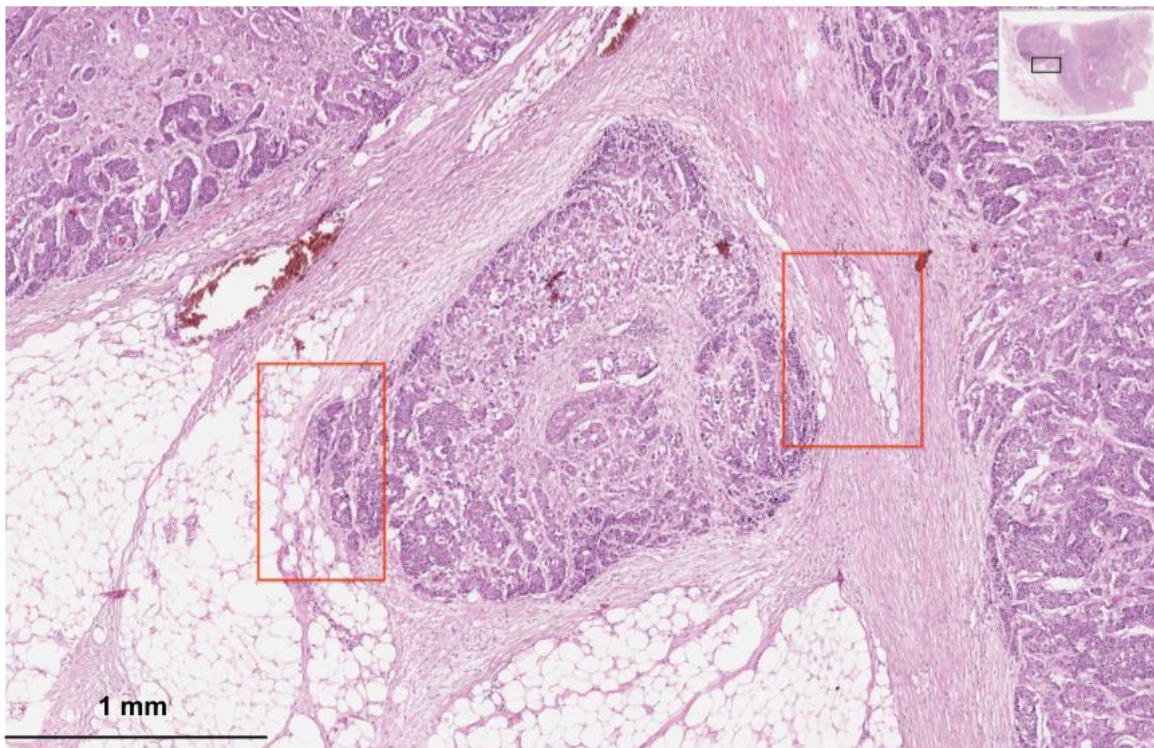



**eFigure 5.** Forest Plots for Expanded Multivariable Analysis Corresponding to eTable 2

**Overall Survival:**

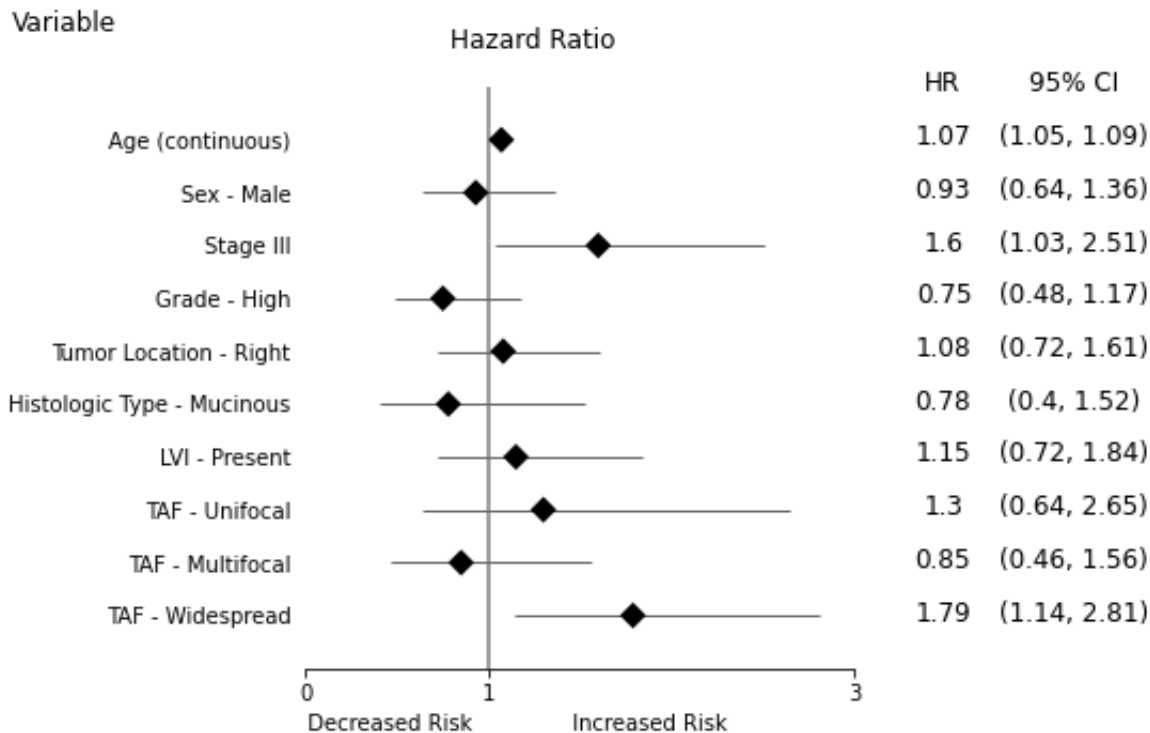

**Disease Specific Survival:**

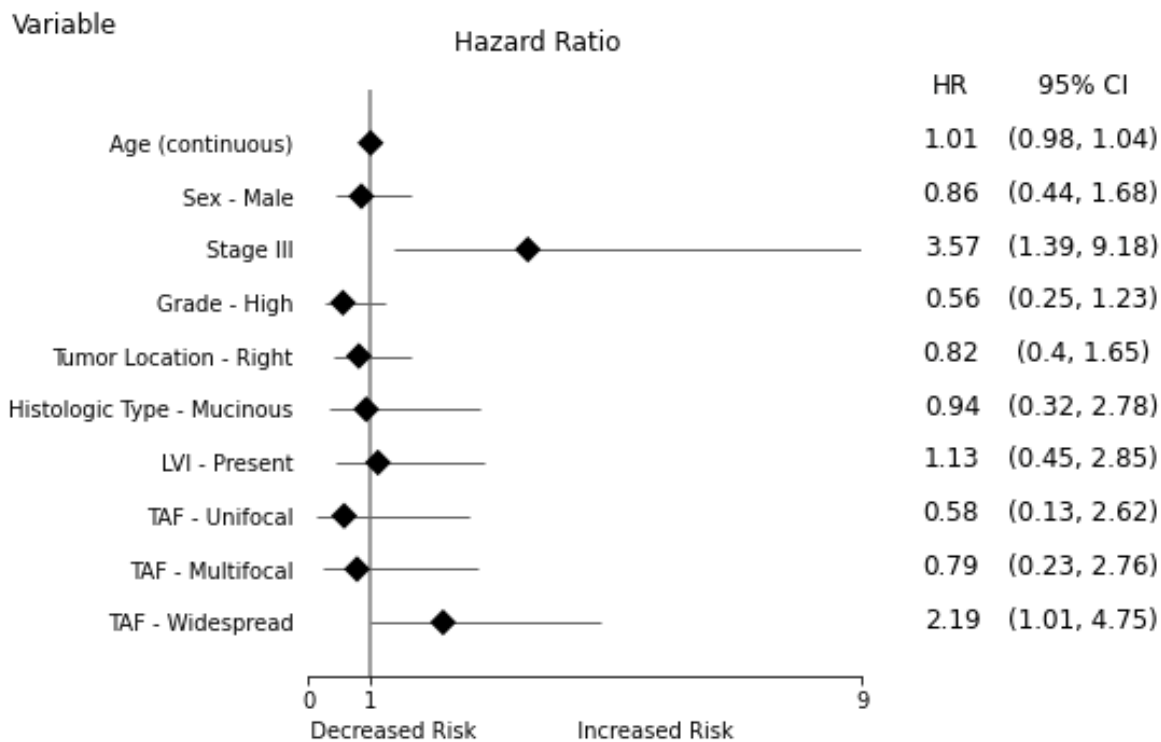

Supplement: jamanetwopen-e2254891-s001.pdf [file jamanetwopen-e2254891-s001.pdf]
