# Supplementary material for: Pathologist Validation of a Machine Learning–Derived Feature for Colon Cancer Risk Stratification
Source: PubMed Central journal article supplement — JAMA Netw Open. 2023 Mar 14;6(3):e2254891. doi: 10.1001/jamanetworkopen.2022.54891 (PMC10015309; doi:10.1001/jamanetworkopen.2022.54891), 2023-03-14
Supplement: jamanetwopen-e2254891-s002.pdf [file jamanetwopen-e2254891-s002.pdf]

## Data Sharing Statement

L'Imperio. Pathologist Validation of a Machine Learning-Derived Feature for Colon Cancer Risk Stratification. *JAMA Netw Open*. Published March 14, 2023.

doi:10.1001/jamanetworkopen.2022.54891

### Data

**Data available:** No

### Additional Information

**Explanation for why data not available:** Data is not shared for consideration of information privacy. Reasonable requests can be made to corresponding author F. Pagni for consideration of data sharing for research purposes.
